# Supplementary material
Source: Springer Nature journal article supplement (https://www.springermedizin.de/resource/supplementary/13054_2012_999_MOESM3_ESM.pdf/9709812)
Supplement: MOESM3 [file 9709812]

5% sample of Medicare beneficiaries

- age>65
- received intensive care
- survived to hospital discharge

n=31,870

Prior diagnosis of dementia  
or cognitive impairment

n= 3,763

No history of dementia or cognitive impairment

n=28,107

History of cardiac surgery

n=2,739

**COHORT OF INTENSIVE CARE SURVIVORS**

**n=25,368**
